# Supplementary material
Source: PubMed Central journal article supplement (PMC11046398)

■ Eos<sup>f/f</sup>  
■ Eos cKO

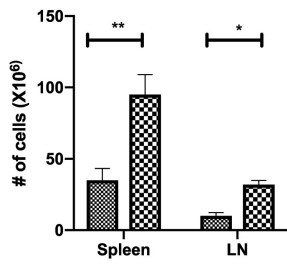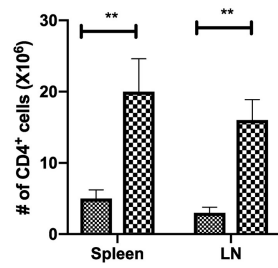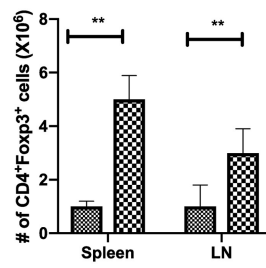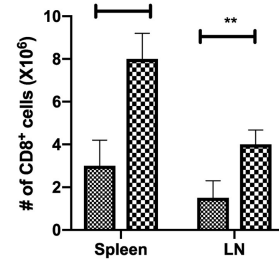

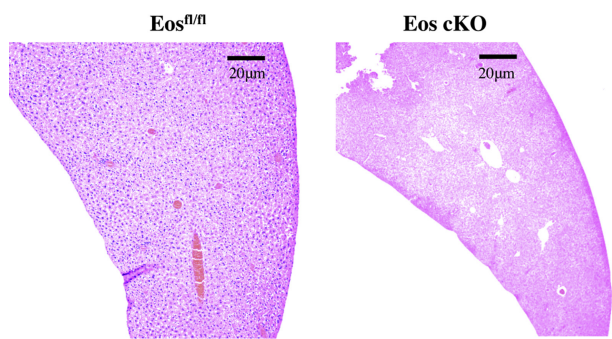

Liver

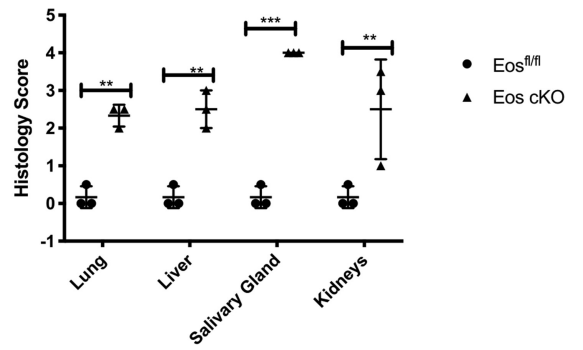

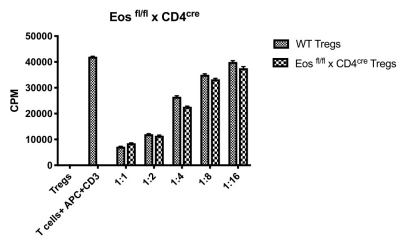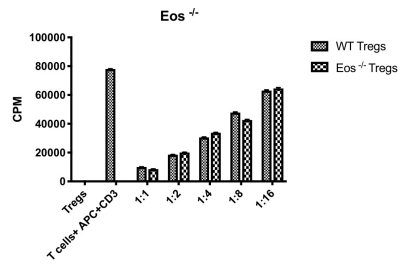

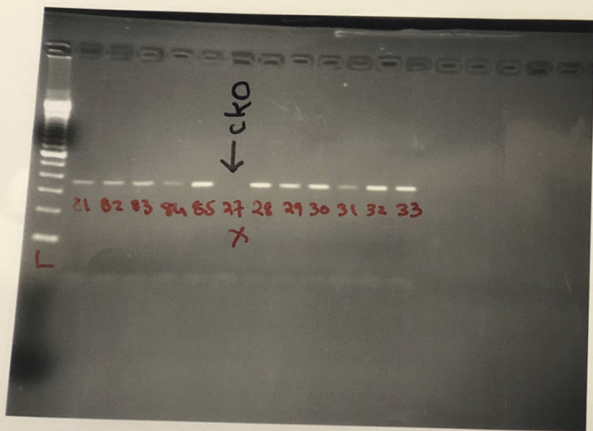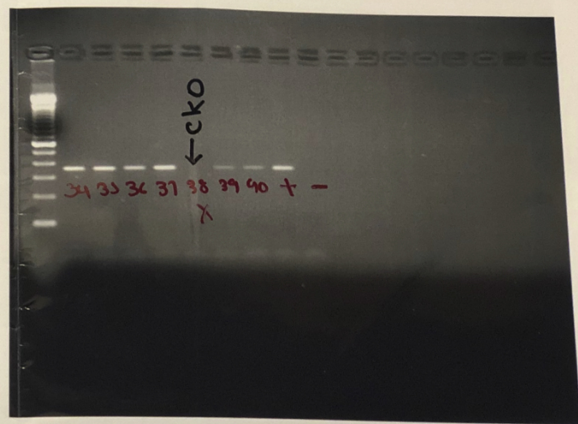

Supplement: NIHMS1981152-supplement-Sup_figs.pdf [file NIHMS1981152-supplement-Sup_figs.pdf]
